# Supplementary material for: Respiratory distress in SARS-CoV-2 exposed uninfected neonates followed in the COVID Outcomes in Mother-Infant Pairs (COMP) Study
Source: PubMed Central journal article supplement (PMC10808093; doi:10.1038/s41467-023-44549-5), 2024-01-24
Supplement: 41467_2023_44549_MOESM1_ESM.pdf [file 41467_2023_44549_MOESM1_ESM.pdf]

SUPPLEMENTAL TABLES AND FIGURES:

| <b>SUPPLEMENTARY TABLE 1: Maternal and infant demographics stratified by maternal vaccination status</b> |                       |                    |          |
|----------------------------------------------------------------------------------------------------------|-----------------------|--------------------|----------|
| Variables                                                                                                | Unvaccinated<br>n=118 | Vaccinated<br>n=68 | P value* |
| <b>Infant Outcomes</b>                                                                                   |                       |                    |          |
| Male Sex (%)                                                                                             | 60 (50.8)             | 31 (45.6)          | 0.590    |
| Vaginal Delivery (%)                                                                                     | 71 (60.2)             | 43 (63.2)          | 0.797    |
| Preterm Delivery < 37 wks                                                                                | 26 (22.0)             | 7 (10.3)           | 0.069    |
| Low birth weight (<2500 g)                                                                               | 27 (22.9)             | 4 (5.9)            | 0.005    |
| <b>Maternal Predictors</b>                                                                               |                       |                    |          |
| Age (mean yrs (s.d.))                                                                                    | 32.32 (6.4)           | 33.79 (5.0)        | 0.105    |
| Ethnicity                                                                                                |                       |                    | 0.507    |
| Asian, mixed race, or other                                                                              | 25 (21.4)             | 17 (25.0)          |          |
| Black, Hispanic, or Latino                                                                               | 62 (53.0)             | 30 (44.1)          |          |
| White                                                                                                    | 30 (25.6)             | 21 (30.9)          |          |
| Pulmonary Hypertension                                                                                   | 0 (0.0)               | 1 (1.5)            | 0.780    |
| Autoimmune disorder                                                                                      | 11 (9.3)              | 6 (8.8)            | 1.000    |
| HIV positive                                                                                             | 2 (1.7)               | 0 (0.0)            | 0.733    |
| Obesity pre pregnancy                                                                                    | 41 (34.7)             | 8 (11.8)           | 0.001    |
| Diabetes                                                                                                 | 5 (4.2)               | 3 (3.3)            | 1.000    |
| Congenital Heart Disease                                                                                 | 6 (5.1)               | 2 (2.9)            | 0.750    |
| Asthma                                                                                                   | 13 (11.0)             | 10 (14.7)          | 0.614    |
| Substance Use                                                                                            | 3 (2.5)               | 5 (7.6)            | 0.219    |
| <b>Pregnancy Complications</b>                                                                           |                       |                    |          |
| Chronic or Gestational Hypertension                                                                      | 38 (32.2)             | 21 (30.9)          | 0.982    |
| Preeclampsia or HELLP                                                                                    | 22 (18.6)             | 8 (11.8)           | 0.307    |
| Gestational Diabetes                                                                                     | 16 (13.6)             | 14 (20.6)          | 0.295    |
| Chorioamnionitis                                                                                         | 9 (7.6)               | 5 (7.4)            | 1.000    |
| Postpartum Hemorrhage                                                                                    | 14 (11.9)             | 3 (4.4)            | 0.151    |
| <b>COVID Predictors</b>                                                                                  |                       |                    |          |
| Vaccination prior to delivery                                                                            | 7 (6.0)               | 68 (100.0)         | <0.001   |
| Trimester of SARS-CoV-2 infection                                                                        |                       |                    | 0.180    |
| First or second                                                                                          | 62 (52.5)             | 28 (0.41)          |          |
| Third                                                                                                    | 56 (47.5)             | 40 (58.8)          |          |
| COVID severity                                                                                           |                       |                    | 0.131    |
| Asymptomatic, Mild, or Moderate                                                                          |                       |                    |          |
| Severe or Critical                                                                                       | 12 (10.2)             | 2 (2.9)            |          |
| COVID symptoms                                                                                           |                       |                    |          |
| Fever                                                                                                    | 33 (28.7)             | 17 (27.9)          | 1.000    |
| Cough, Rhinorrhea, Congestion                                                                            | 81 (71.1)             | 56 (91.8)          | 0.003    |

|                                                                                                                                          |           |           |        |
|------------------------------------------------------------------------------------------------------------------------------------------|-----------|-----------|--------|
| Dyspnea                                                                                                                                  | 29 (25.0) | 6 (9.8)   | 0.027  |
| Nausea/Vomiting, Abdominal Pain,<br>Diarrhea                                                                                             | 20 (17.5) | 5 (8.2)   | 0.145  |
| Anosmia or Dysgeusia                                                                                                                     | 33 (28.9) | 7 (11.5)  | 0.015  |
| Treatment                                                                                                                                |           |           |        |
| Remdesivir                                                                                                                               | 12 (10.2) | 5 (7.4)   | 0.706  |
| Dexamethasone                                                                                                                            | 10 (8.5)  | 1 (1.5)   | 0.104  |
| Convalescent Plasma                                                                                                                      | 3 (2.5)   | 0 (0.0)   | 0.471  |
| Monoclonal Antibodies                                                                                                                    | 6 (5.1)   | 8 (11.8)  | 0.169  |
| Paxlovid                                                                                                                                 | 1 (0.8)   | 2 (2.9)   | 0.626  |
| Variant                                                                                                                                  |           |           | <0.001 |
| Ancestral and Others                                                                                                                     | 93 (80.2) | 2 (3.0)   |        |
| Alpha                                                                                                                                    | 1 (0.9)   | 0 (0.0)   |        |
| Delta                                                                                                                                    | 11 (9.5)  | 15 (22.4) |        |
| Omicron                                                                                                                                  | 11 (9.5)  | 50 (74.6) |        |
| *p-values were calculated based on one-sided Fisher's exact test. We did not adjust for multiple comparisons because it was exploratory. |           |           |        |

**SUPPLEMENTARY FIGURE 1:** Distribution of infants with and without respiratory distress across gestational ages by hypertensive disorders of pregnancy (n=199).

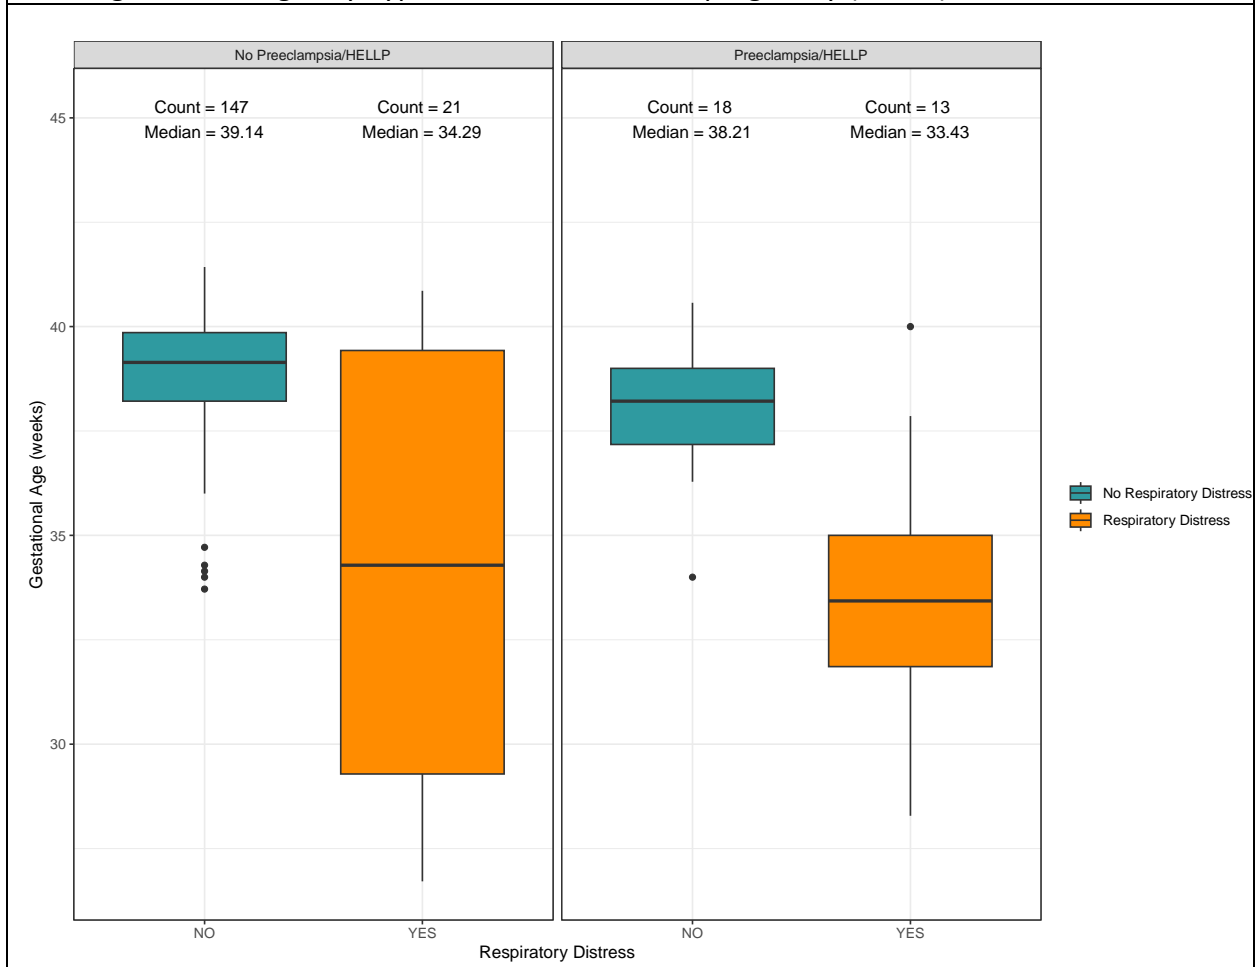

**SUPPLEMENTARY FIGURE 2:** Hypothesized relationship between maternal SARS-CoV-2, hypertensive disorders of pregnancy, prematurity, and neonatal respiratory distress

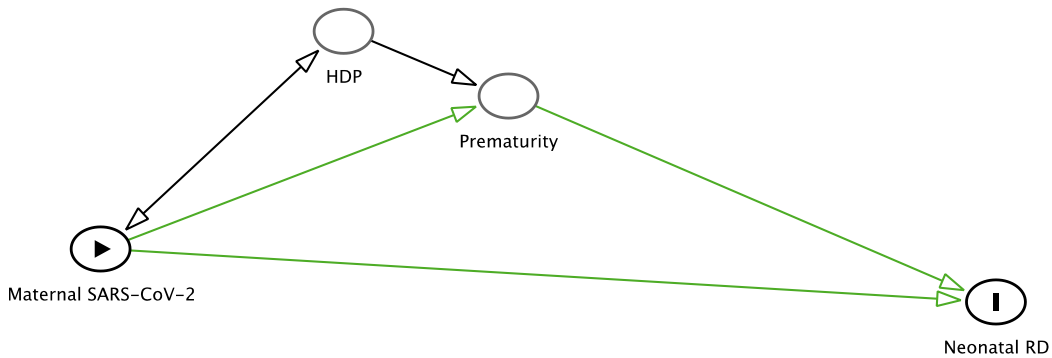

HDP: hypertensive disorder of pregnancy; RD: respiratory distress

Our hypothesized relationship between these variables is threefold: 1. There is a large overlap between the clinical presentations of HDP and severe SARS-CoV-2, which can make it difficult to differentiate between these entities clinically; 2. It is both possible that patient's with HDP may have more severe manifestations of COVID and that COVID may exacerbate HDP; 3. Both HDP and COVID can increase the risk for prematurity.

Created with daggity.com

**SUPPLEMENTARY FIGURE 3: Univariate logistic regression analysis of respiratory distress in neonates born to women infected with COVID during pregnancy (n=199).**

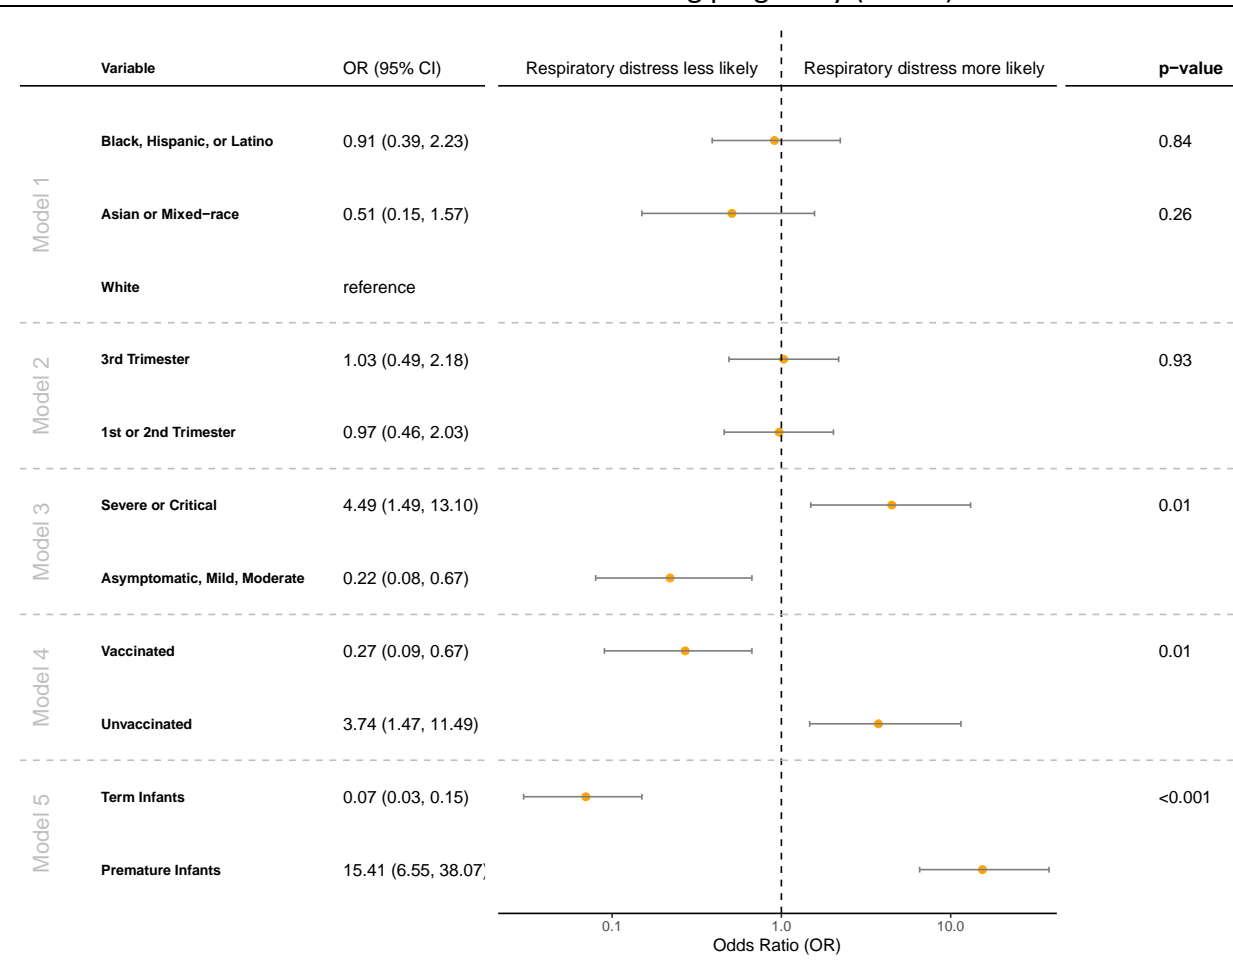

OR: odds ratio; CI: Confidence interval

Data is presented as the OR +/- 95% CI; p-values are calculated based on a one sided Wald's test.

COVID severity index was determined based on the NIH classification system<sup>41</sup>, as done by Thompson et al.<sup>4</sup> and described in our methods. Briefly, critical illness describes patients with respiratory failure or signs of multiple organ failure, severe illness was defined as patients with desaturations requiring supplemental oxygen, moderate illness included patients with dyspnea or who were admitted to an inpatient unit for COVID, mild illness describes symptomatic patients not meeting criteria for more severe disease, and asymptomatic individuals showed no symptoms.

**SUPPLEMENTARY FIGURE 4:** Multivariable logistic regression analysis of respiratory distress in neonates born to women infected with COVID during pregnancy (n=199).

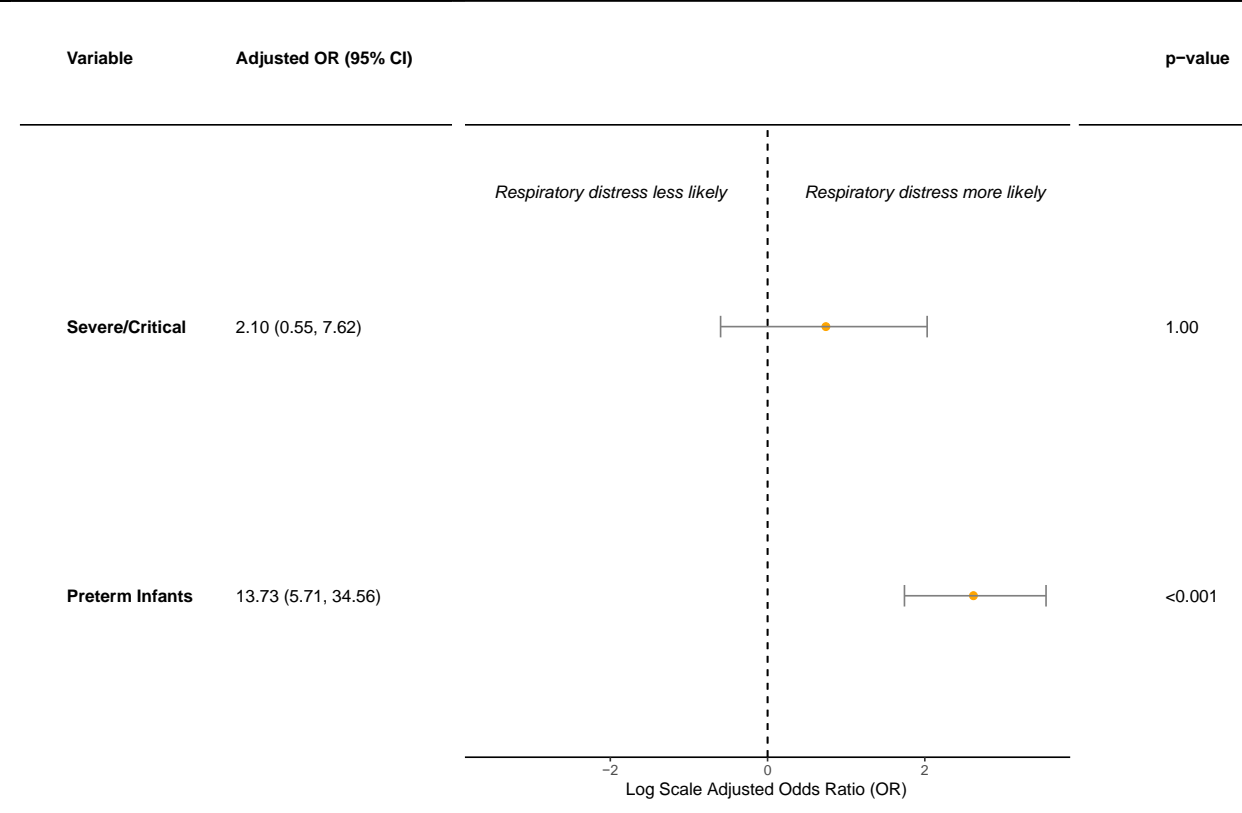

OR: odds ratio; CI: Confidence interval

Data is presented as the OR +/- 95% CI; p-values are calculated based on one sided Wald's test

Multivariable logistic regression model included maternal COVID-19 severity and infant prematurity as predictors for respiratory distress.

Severe/Critical refers to mothers who had signs of respiratory failure, multiorgan failure, or desaturations requiring supplemental oxygen compared to mothers who had moderate/mild/or asymptomatic disease (reference group).

Preterm infants refers to neonates born at less than 37 weeks gestation compared to term infants (reference group) born at greater than or equal to 37 weeks gestation.
